# Supplementary figures and images for: Prolonged β-adrenergic stimulation disperses ryanodine receptor clusters in cardiomyocytes and has implications for heart failure
Source: eLife journal article supplement (doi:10.7554/elife.77725), 2022-08-01

**Gel 1**

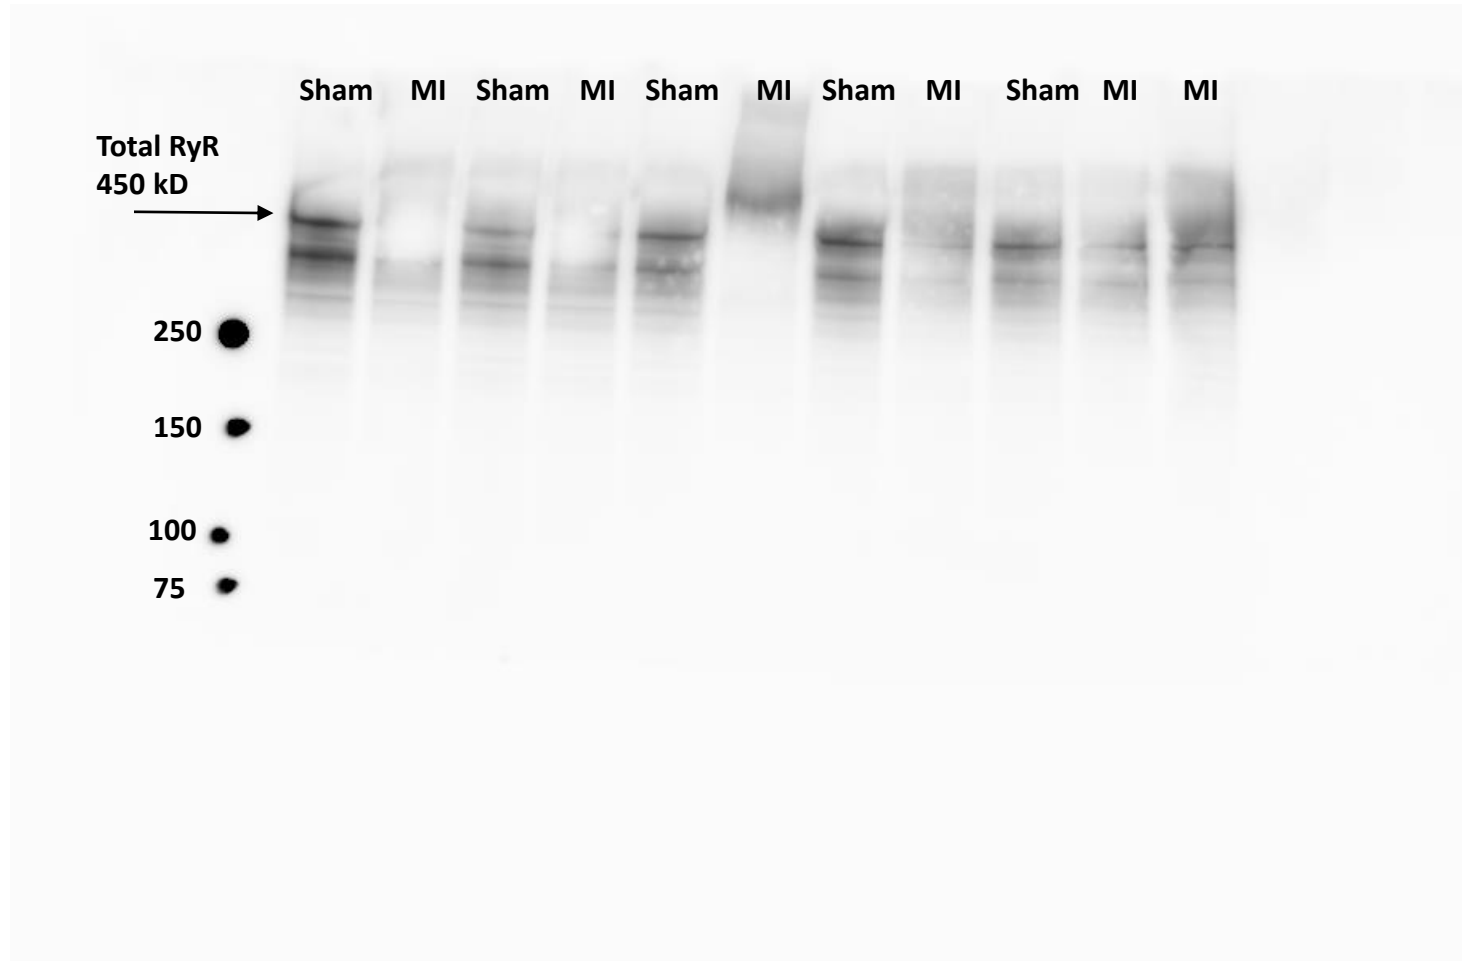

**Gel 2**

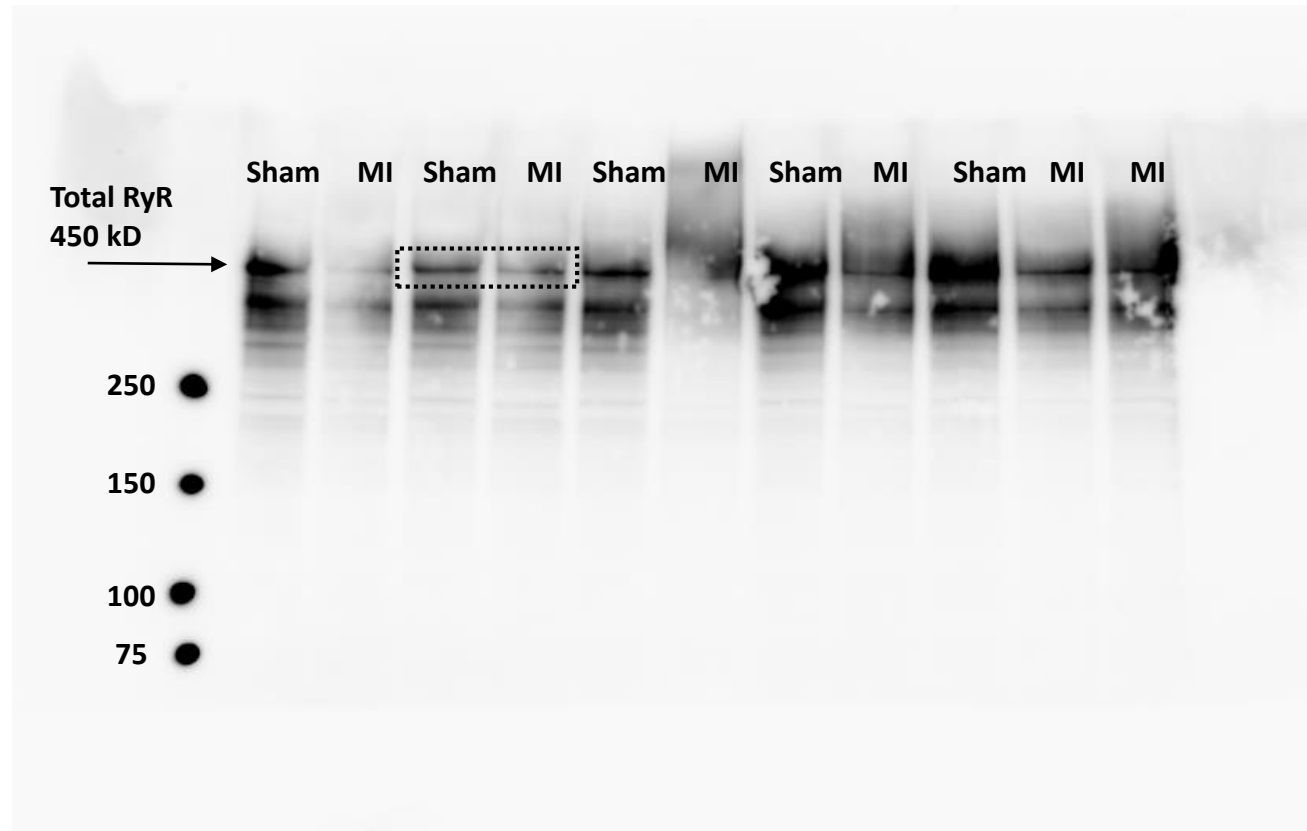

**Gel 1**

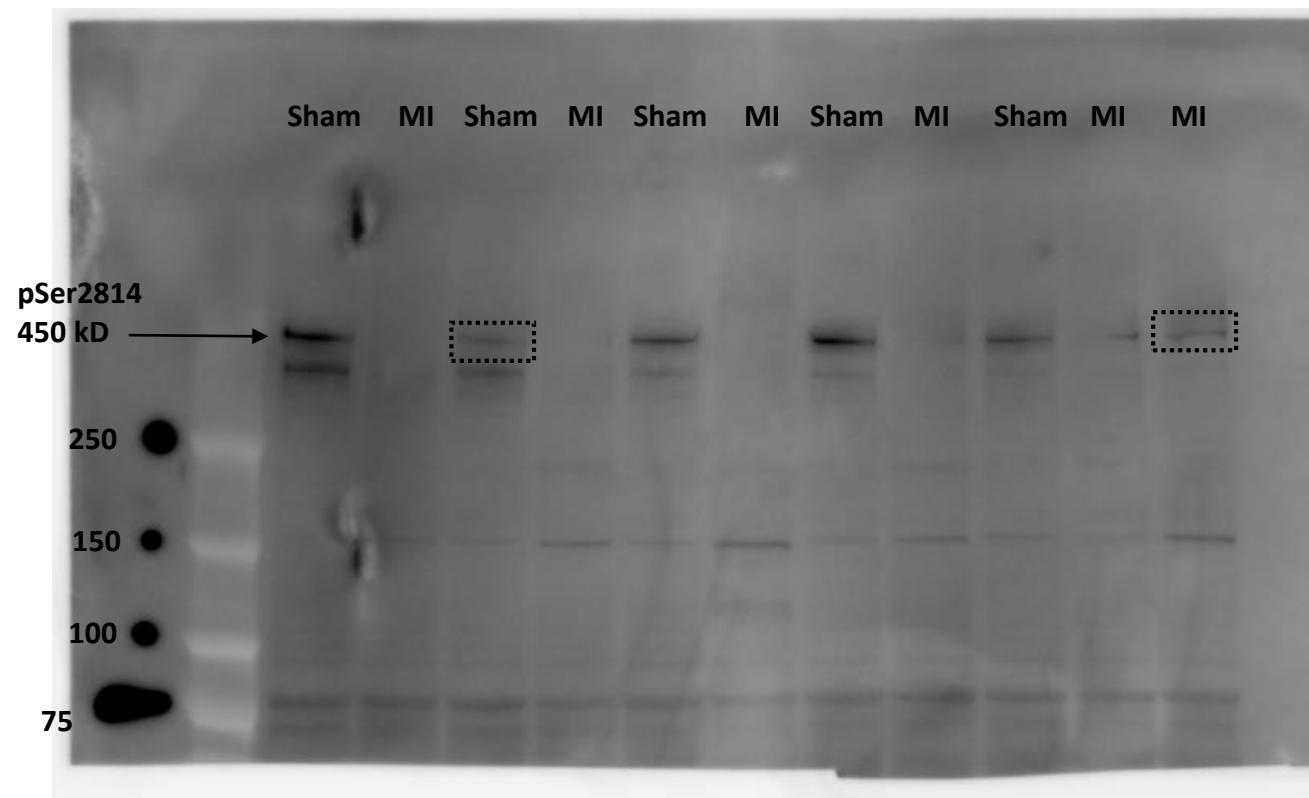

Gel 2

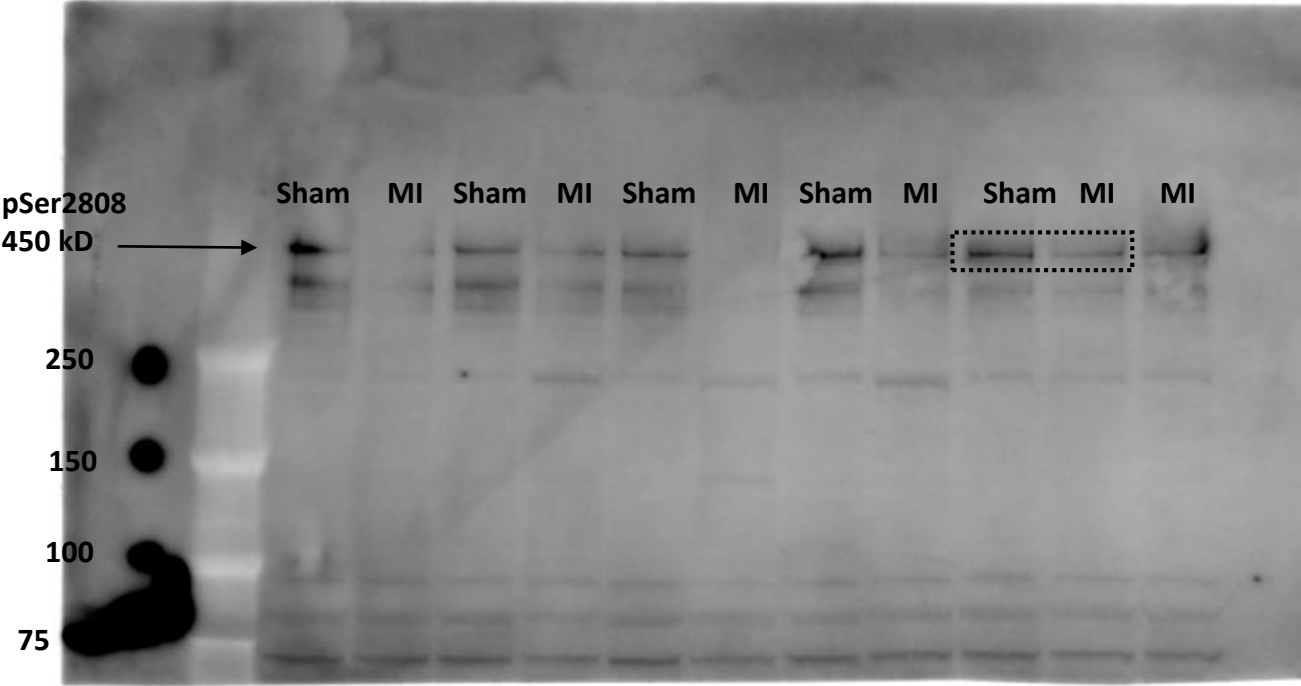

**Gel 1**

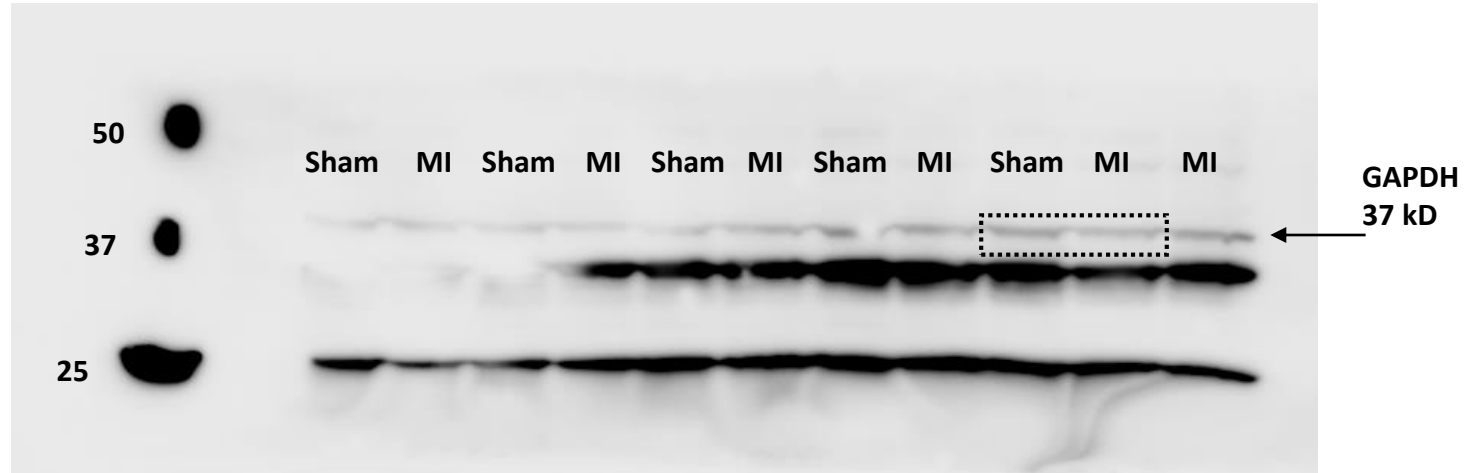

**Gel 2**

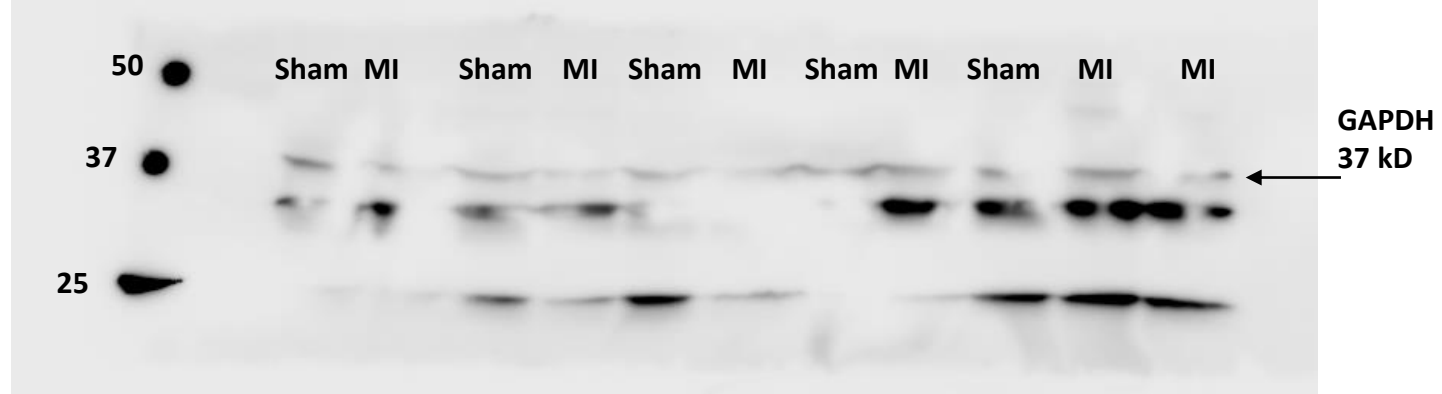

Supplement: supp [file Labelled Western blot of RyR2, 2814, 2808 and GAPDH.pdf › Source Data 1/Labelled Western blot of RyR2, 2814, 2808 and GAPDH.pdf]
